# Supplementary material
Source: HighWire-hosted journal article supplement (https://www.rcpjournals.org/highwire/filestream/11175/field_highwire_adjunct_files/1/Pendlebury_Supplementary_S2.pdf)
Supplement: Pendlebury_Supplementary_S2.pdf [file Pendlebury_Supplementary_S2.pdf]

## **Impact of a system-wide multicomponent intervention on administrative diagnostic coding for delirium and other cognitive frailty syndromes: Observational prospective study**

### **Sample Calculation to illustrate how inclusion of a delirium code may change the tariff received by a hospital for a given patient episode**

Using the HRG4+ 2017/18 Reference Payment Grouper from the NHS National Casemix Office, a hospital would receive the following payment

[\(https://improvement.nhs.uk/resources/developing-the-national-tariff/](https://improvement.nhs.uk/resources/developing-the-national-tariff/)

for different hypothetical admissions:

- 1) £861 for an admission with: primary diagnosis of UTI (N390), and secondary codes of hypertension (I10X) and gout (M100), and length of stay of 2 days
  
- 2) £861 for an admission with: primary diagnosis of UTI (N390), and secondary codes of hypertension (I10X) and gout (M100), wrongly coded as not having delirium, and length of stay of 7 days
  
- 3) £1,504 for an admission with: primary diagnosis of UTI (N390), and secondary codes of hypertension (I10X), gout (M100), and delirium (F509), and length of stay of 7 days

In this example, delirium tips the patient into a higher payment Health Resource Group (HRG). In this case jumping from LA04S “Kidney or UTIs, without interventions, with CC Score 0-1” to LA04R “Kidney or UTIs, without Interventions, with CC Score 2-3”.

With thanks to Ramon Luengo-Fernandez DPhil

University Research Lecturer  
Centre for Prevention of Stroke and Dementia  
Nuffield Department of Clinical Neurosciences  
University of Oxford  
Oxford OX3 7LF
